# Supplementary material
Source: PubMed Central journal article supplement (PMC7578780)
Supplement: NIHMS1633089-supplement-Supplemental_tables___references.pdf [file NIHMS1633089-supplement-Supplemental_tables___references.pdf]

**Table 1 Topotecan mapping to LUDI1 pharmacophore**

| Pose                          | 1    | 2    | 3    | 4    | 5    | 6     |
|-------------------------------|------|------|------|------|------|-------|
| <i>Mapped features</i>        | 3    | 3    | 3    | 3    | 4    | 4     |
| HYD Tyr426                    | -    | -    | -    | -    | -    | y     |
| HYD Leu721                    | -    | y    | -    | -    | y    | -     |
| HBD Asn722                    | -    | -    | y    | y    | y    | -     |
| HBD Asp533                    | -    | y    | -    | -    | -    | -     |
| HBA Arg364                    | y    | -    | -    | y    | -    | y     |
| HBD Glu356                    | y    | -    | y    | -    | y    | y     |
| CYPI                          | y    | y    | y    | y    | y    | y     |
| <i>Fit value</i>              | 0.40 | 0.36 | 0.31 | 0.23 | 0.12 | 0.001 |
| <i>RMSD to X-ray pose (Å)</i> | 5.00 | 8.34 | 9.40 | 7.22 | 6.08 | 8.66  |

**Table 2 Camptothecin mapping to LUDI1 pharmacophore**

| Pose                          | 1    | 2    | 3    | 4     | 5      |
|-------------------------------|------|------|------|-------|--------|
| <i>Mapped features</i>        | 2    | 3    | 3    | 3     | 3      |
| HYD Tyr426                    | -    | y    | -    | -     | -      |
| HYD Leu721                    | -    | y    | y    | y     | -      |
| HBD Asn722                    | -    | y    | y    | -     | -      |
| HBD Asp533                    | y    | -    | -    | -     | -      |
| HBA Arg364                    | -    | -    | -    | y     | y      |
| HBD Glu356                    | -    | -    | -    | -     | y      |
| CYPI                          | y    | -    | y    | y     | y      |
| <i>Fit value</i>              | 0.39 | 0.14 | 0.12 | 0.001 | 0.0003 |
| <i>RMSD to X-ray pose (Å)</i> | 3.46 | 7.85 | 6.11 | 6.01  | 9.71   |

**Table 3 MJ-II-38 mapping to LUDI1 pharmacophore**

| Pose                          | 1    | 2    | 3    |
|-------------------------------|------|------|------|
| <i>Mapped features</i>        | 2    | 2    | 2    |
| HYD Tyr426                    | -    | y    | -    |
| HYD Leu721                    | y    | -    | -    |
| HBD Asn722                    | -    | -    | -    |
| HBD Asp533                    | -    | -    | -    |
| HBA Arg364                    | -    | -    | y    |
| HBD Glu356                    | -    | -    | -    |
| CYPI                          | y    | y    | y    |
| <i>Fit value</i>              | 0.37 | 0.34 | 0.27 |
| <i>RMSD to X-ray pose (Å)</i> | 5.79 | 4.25 | 6.12 |

**Table 4 AI-III-52 mapping to LUDI1 pharmacophore**

| Pose                          | 1    | 2    | 3    | 4     |
|-------------------------------|------|------|------|-------|
| <i>Mapped features</i>        | 2    | 3    | 3    | 2     |
| HYD Tyr426                    | -    | y    | y    | y     |
| HYD Leu721                    | y    | -    | y    | -     |
| HBD Asn722                    | -    | -    | -    | -     |
| HBD Asp533                    | -    | -    | -    | -     |
| HBA Arg364                    | -    | y    | -    | -     |
| HBD Glu356                    | -    | -    | -    | -     |
| CYPI                          | y    | y    | y    | y     |
| <i>Fit value</i>              | 0.39 | 0.02 | 0.01 | 0.004 |
| <i>RMSD to X-ray pose (Å)</i> | 3.12 | 6.91 | 8.89 | 6.67  |

**Table 5 SA315F mapping to LUDI1 pharmacophore**

| Pose                          | 1    | 2    | 3     | 4    | 5    | 6    | 7    | 8    |
|-------------------------------|------|------|-------|------|------|------|------|------|
| <i>Mapped features</i>        | 3    | 3    | 4     | 3    | 3    | 4    | 4    | 4    |
| HYD Tyr426                    | -    | -    | -     | -    | -    | -    | -    | -    |
| HYD Leu721                    | -    | y    | -     | -    | y    | y    | -    | -    |
| HBD Asn722                    | y    | y    | y     | -    | -    | y    | y    | -    |
| HBD Asp533                    | y    | -    | y     | -    | -    | -    | -    | y    |
| HBA Arg364                    | -    | -    | y     | y    | -    | -    | y    | y    |
| HBD Glu356                    | -    | -    | -     | y    | y    | y    | y    | y    |
| CYPI                          | y    | y    | y     | y    | y    | y    | y    | y    |
| <i>Fit value</i>              | 0.56 | 0.41 | 0.36  | 0.25 | 0.22 | 0.18 | 0.14 | 0.04 |
| <i>RMSD to X-ray pose (Å)</i> | 8.23 | 8.13 | 10.04 | 6.28 | 4.93 | 8.33 | 7.61 | 8.73 |

**Table 6 Topotecan mapping to LUDI2 pharmacophore, top 10 poses**

| Pose                          | 1    | 2    | 3     | 4    | 5    | 6    | 7    | 8     | 9     | 10    |
|-------------------------------|------|------|-------|------|------|------|------|-------|-------|-------|
| <i>Mapped features</i>        | 4    | 5    | 6     | 4    | 4    | 4    | 4    | 4     | 4     | 4     |
| HYD Tyr426                    | y    | y    | y     | -    | -    | y    | -    | y     | y     | -     |
| HBD Asn722                    | -    | -    | -     | -    | -    | y    | -    | -     | -     | -     |
| HBD Thr718                    | y    | y    | -     | -    | -    | -    | y    | -     | -     | -     |
| HBD Asp533                    | -    | -    | -     | -    | -    | -    | -    | -     | -     | -     |
| HBA Arg364                    | -    | -    | y     | -    | -    | -    | y    | y     | y     | y     |
| HBD Glu356                    | -    | -    | -     | -    | -    | -    | -    | -     | -     | -     |
| HBD Lys354                    | -    | -    | -     | -    | -    | -    | -    | -     | -     | y     |
| HBA Asn352                    | -    | y    | y     | y    | y    | -    | y    | -     | -     | -     |
| HBD Asn352 bb                 | -    | -    | y     | -    | y    | -    | -    | y     | -     | -     |
| HBD DNA sugar1                | -    | -    | -     | -    | -    | -    | -    | -     | -     | -     |
| HBD DNA sugar2                | -    | y    | y     | y    | y    | -    | -    | -     | -     | y     |
| HBD DNA sugar3                | y    | -    | -     | y    | -    | y    | -    | -     | y     | -     |
| CYPI                          | y    | y    | y     | y    | y    | y    | y    | y     | y     | y     |
| <i>Fit value</i>              | 0.33 | 0.33 | 0.11  | 0.08 | 0.05 | 0.02 | 0.02 | 0.005 | 0.002 | 0.001 |
| <i>RMSD to X-ray pose (Å)</i> | 9.00 | 9.00 | 10.00 | 3.47 | 3.83 | 9.27 | 3.72 | 5.41  | 6.34  | 4.21  |

**Table 7 Camptothecin mapping to LUDI2 pharmacophore**

| Pose                          | 1      | 2      |
|-------------------------------|--------|--------|
| <i>Mapped features</i>        | 4      | 4      |
| HYD Tyr426                    | y      | y      |
| HBD Asn722                    | -      | -      |
| HBD Thr718                    | -      | -      |
| HBD Asp533                    | -      | -      |
| HBA Arg364                    | y      | -      |
| HBD Glu356                    | -      | y      |
| HBD Lys354                    | -      | -      |
| HBA Asn352                    | -      | y      |
| HBD Asn352 bb                 | -      | -      |
| HBD DNA sugar1                | -      | -      |
| HBD DNA sugar2                | -      | -      |
| HBD DNA sugar3                | y      | -      |
| CYPI                          | y      | y      |
| <i>Fit value</i>              | 0.0003 | 0.0002 |
| <i>RMSD to X-ray pose (Å)</i> | 6.05   | 9.89   |

**Table 8 MJ-II-38 and AI-III-52 mapping to LUDI2 pharmacophore**

| Pose                          | MJ-II-38 | AI-III-52 |
|-------------------------------|----------|-----------|
| <i>Mapped features</i>        | 4        | 4         |
| HYD Tyr426                    | y        | y         |
| HBD Asn722                    | -        | -         |
| HBD Thr718                    | -        | -         |
| HBD Asp533                    | -        | -         |
| HBA Arg364                    | y        | y         |
| HBD Glu356                    | -        | -         |
| HBD Lys354                    | -        | -         |
| HBA Asn352                    | y        | y         |
| HBD Asn352 bb                 | -        | -         |
| HBD DNA sugar1                | -        | -         |
| HBD DNA sugar2                | -        | -         |
| HBD DNA sugar3                | -        | -         |
| CYPI                          | y        | y         |
| <i>Fit value</i>              | 0.00004  | 0.008     |
| <i>RMSD to X-ray pose (Å)</i> | 6.14     | 7.09      |

**Table 9 SA315F mapping to LUDI2 pharmacophore, top 6 poses**

| <b>Pose</b>                   | <b>1</b> | <b>2</b> | <b>3</b> | <b>4</b> | <b>5</b> | <b>6</b> | <b>7</b> | <b>8</b> | <b>9</b> | <b>10</b> |
|-------------------------------|----------|----------|----------|----------|----------|----------|----------|----------|----------|-----------|
| <i>Mapped features</i>        | 5        | 6        | 5        | 8        | 6        | 7        | 5        | 5        | 5        | 5         |
| HYD Tyr426                    | -        | y        | y        | y        | -        | -        | y        | y        | y        | -         |
| HBD Asn722                    | -        | -        | y        | -        | y        | y        | -        | -        | -        | y         |
| HBD Thr718                    | y        | -        | -        | -        | y        | y        | -        | -        | -        | y         |
| HBD Asp533                    | y        | -        | -        | -        | y        | y        | -        | -        | -        | y         |
| HBA Arg364                    | y        | -        | -        | y        | y        | y        | -        | y        | -        | -         |
| HBD Glu356                    | -        | y        | y        | y        | -        | -        | y        | y        | y        | -         |
| HBD Lys354                    | -        | y        | -        | y        | -        | -        | -        | -        | -        | -         |
| HBA Asn352                    | -        | y        | -        | y        | -        | y        | y        | -        | -        | -         |
| HBD Asn352 bb                 | -        | y        | y        | y        | -        | -        | y        | y        | y        | -         |
| HBD DNA sugar1                | y        | -        | -        | -        | y        | -        | -        | -        | -        | y         |
| HBD DNA sugar2                | -        | -        | -        | y        | -        | y        | -        | -        | -        | -         |
| HBD DNA sugar3                | -        | -        | -        | -        | -        | -        | -        | -        | y        | -         |
| CYPI                          | y        | y        | y        | y        | y        | y        | y        | y        | y        | y         |
| <i>Fit value</i>              | 0.49     | 0.46     | 0.42     | 0.42     | 0.41     | 0.40     | 0.40     | 0.39     | 0.38     | 0.38      |
| <i>RMSD to X-ray pose (Å)</i> | 9.36     | 5.76     | 6.05     | 6.62     | 9.15     | 6.09     | 6.48     | 6.47     | 6.62     | 9.07      |

**Table 10 Validation set for Top1 docking**

| Compound                                                                                                  | Activity <sup>a</sup> | Compound                                                                                                    | Activity <sup>a</sup> |
|-----------------------------------------------------------------------------------------------------------|-----------------------|-------------------------------------------------------------------------------------------------------------|-----------------------|
| 20R-Camptothecin<br>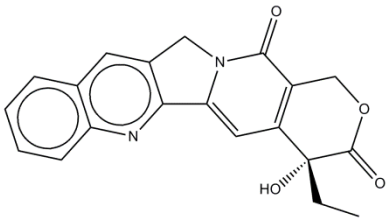     | 0 [1]                 | Morrell2007(2)_mol145<br> | 3 [2]                 |
| 20S-Camptothecin<br>     | 4 [1]                 | Morrell2007(2)_mol190<br> | 1 [2]                 |
| Amsacrine<br>           | 0 [3]                 | Morrell2007_Mml38<br>    | 4 [4]                 |
| Cinelli2009_mol27d<br> | 3 [5]                 | NSC 39875<br>           | 1.5 [6]               |
| Cinelli2009_mol27j<br> | 2 [5]                 | NSC 40666<br>            | 0 [6]                 |

| Compound                                                                                                | Activity <sup>a</sup> | Compound                                                                                           | Activity <sup>a</sup> |
|---------------------------------------------------------------------------------------------------------|-----------------------|----------------------------------------------------------------------------------------------------|-----------------------|
| Daunorubicin<br>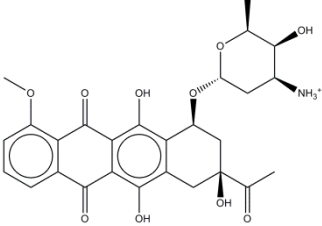       | 0 [7]                 | NSC 42379<br>     | 1 [6]                 |
| Doxorubicin<br>        | 0 [8]                 | NSC 53340<br>     | 1 [6]                 |
| Etoposide<br>         | 0 <sup>b</sup>        | NSC 270924<br>  | 0 [6]                 |
| Lackey1995_mol10<br> | 0 [9]                 | NSC 318814<br> | 1 [6]                 |
| Lackey1995_mol25<br> | 0 [9]                 | NSC 661172<br> | 1 [6]                 |
| Lackey1995_mol26<br> | 0 [9]                 | NSC 674004<br> | 1.5 [6]               |

| Compound                                                                            | Activity <sup>a</sup> | Compound                                                                             | Activity <sup>a</sup> |
|-------------------------------------------------------------------------------------|-----------------------|--------------------------------------------------------------------------------------|-----------------------|
| Lackey1995_mol27                                                                    | 0 [9]                 | Nagarajan2003_mol23                                                                  | 0 [10]                |
| 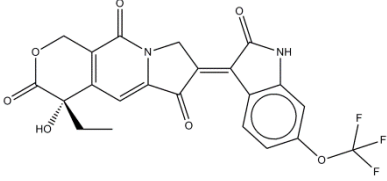   |                       |    |                       |
| Mitoxantrone                                                                        | 0 [11]                | Nagarajan2003_mol7b                                                                  | 5 [10]                |
|    |                       |    |                       |
| Morrell2004_mol14                                                                   | 3 [12]                | Nagarajan2004_mol17                                                                  | 5 [13]                |
|   |                       |   |                       |
| Morrell2004_mol31                                                                   | 1 [12]                | Nagarajan2006_mol12                                                                  | 2 [14]                |
|  |                       |  |                       |
| Morrell2006(2)_mol20                                                                | 0 [15]                | Nagarajan2006_mol13                                                                  | 3 [14]                |
|  |                       |  |                       |
| Morrell2006(2)_mol30                                                                | 5 [15]                | Song2010_mol15                                                                       | 2 [16]                |
|  |                       |  |                       |



| Compound                                                                                               | Activity <sup>a</sup> | Compound                                                                                             | Activity <sup>a</sup> |
|--------------------------------------------------------------------------------------------------------|-----------------------|------------------------------------------------------------------------------------------------------|-----------------------|
| Morrell2006_mol37<br>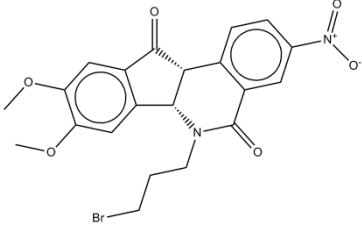 | 5 [17]                | Teniposide<br>      | 0 <sup>b</sup>        |
| Morrell2006_mol40<br> | 0 [17]                | Van2007_mol12b<br> | 0 [18]                |
| Morrell2006_mol6<br> | 0 [17]                | Van2007_mol15l<br> | 5 [18]                |

<sup>a</sup> measured semi-quantitatively in DNA cleavage assay as described in the Methods section (for values higher than 0); <sup>b</sup> unpublished data, measured in DNA cleavage assay; [reference number], reference list at the end of this document.

**Table 11 Docking scores and performance in different docking settings**

| <b>Compound</b>                            | <b>Flexible docking<sup>a</sup>, GOLD score<sup>b</sup></b> | <b>Flexible docking<sup>a</sup>, ChemPLP score<sup>b</sup></b> | <b>Flexible docking<sup>a</sup> with waters<sup>c</sup>, GOLD score<sup>b</sup></b> | <b>Flexible docking<sup>a</sup> with waters<sup>c</sup>, mean GOLD score<sup>d</sup></b> |
|--------------------------------------------|-------------------------------------------------------------|----------------------------------------------------------------|-------------------------------------------------------------------------------------|------------------------------------------------------------------------------------------|
| 20R-Camptothecin                           | 76.22                                                       | 88.96                                                          | 83.77                                                                               | 77.14                                                                                    |
| 20S-Camptothecin                           | 81.07                                                       | 102.40                                                         | 89.63                                                                               | 79.69                                                                                    |
| Amsacrine                                  | 68.20                                                       | 85.93                                                          | 75.99                                                                               | 72.36                                                                                    |
| Cinelli2009_27d                            | 94.75                                                       | 110.38                                                         | 98.32                                                                               | 95.31                                                                                    |
| Cinelli2009_27j                            | 106.04                                                      | 119.14                                                         | 106.38                                                                              | 101.56                                                                                   |
| Daunorubicin                               | 83.41                                                       | 97.19                                                          | 85.02                                                                               | 74.70                                                                                    |
| Doxorubicin                                | 86.58                                                       | 89.47                                                          | 74.90                                                                               | 66.20                                                                                    |
| Etoposide                                  | 72.43                                                       | 58.01                                                          | 53.55                                                                               | 48.62                                                                                    |
| Lackey1995_10                              | 50.69                                                       | 95.66                                                          | 57.15                                                                               | 52.06                                                                                    |
| Lackey1995_25                              | 84.74                                                       | 100.76                                                         | 83.23                                                                               | 77.42                                                                                    |
| Lackey1995_26                              | 82.78                                                       | 96.85                                                          | 88.65                                                                               | 77.58                                                                                    |
| Lackey1995_27                              | 87.61                                                       | 107.33                                                         | 90.76                                                                               | 82.33                                                                                    |
| Mitoxantrone                               | 81.31                                                       | 115.24                                                         | 67.08                                                                               | 57.49                                                                                    |
| Morrell2004_14                             | 68.21                                                       | 74.43                                                          | 72.30                                                                               | 64.63                                                                                    |
| Morrell2004_31                             | 85.39                                                       | 99.40                                                          | 90.55                                                                               | 76.00                                                                                    |
| Morrell2006(2)_20                          | 79.50                                                       | 90.79                                                          | 81.83                                                                               | 78.33                                                                                    |
| Morrell2006(2)_30                          | 84.31                                                       | 106.45                                                         | 85.14                                                                               | 84.42                                                                                    |
| Morrell2006_37                             | 81.77                                                       | 64.21                                                          | 89.57                                                                               | 76.79                                                                                    |
| Morrell2006_40                             | 79.94                                                       | 97.63                                                          | 81.40                                                                               | 78.64                                                                                    |
| Morrell2006_6                              | 92.98                                                       | 113.31                                                         | 95.42                                                                               | 90.43                                                                                    |
| Morrell2007(2)_45                          | 91.23                                                       | 101.93                                                         | 95.45                                                                               | 90.59                                                                                    |
| Morrell2007(2)_90                          | 98.75                                                       | 107.49                                                         | 94.87                                                                               | 90.20                                                                                    |
| Morrell2007_38                             | 95.88                                                       | 111.05                                                         | 91.92                                                                               | 88.93                                                                                    |
| NSC 0039875                                | 81.60                                                       | 100.96                                                         | 90.61                                                                               | 77.86                                                                                    |
| NSC 0040666                                | 77.76                                                       | 70.19                                                          | 65.62                                                                               | 72.63                                                                                    |
| NSC 0042379                                | 81.18                                                       | 101.53                                                         | 97.18                                                                               | 74.98                                                                                    |
| NSC 0053340                                | 75.78                                                       | 109.94                                                         | 101.20                                                                              | 77.02                                                                                    |
| NSC 0270924                                | 71.33                                                       | 113.92                                                         | 96.32                                                                               | 65.16                                                                                    |
| NSC 0318814                                | 74.44                                                       | 79.94                                                          | 85.24                                                                               | 68.79                                                                                    |
| NSC 0661172                                | 75.22                                                       | 75.98                                                          | 78.80                                                                               | 70.17                                                                                    |
| NSC 0674004                                | 92.98                                                       | 82.18                                                          | 80.74                                                                               | 78.12                                                                                    |
| Nagarajan2003_23                           | 86.91                                                       | 84.95                                                          | 80.57                                                                               | 84.45                                                                                    |
| Nagarajan2003_7b                           | 60.16                                                       | 105.65                                                         | 71.20                                                                               | 62.94                                                                                    |
| Nagarajan2004_17                           | 88.18                                                       | 79.63                                                          | 71.83                                                                               | 91.00                                                                                    |
| Nagarajan2006_12                           | 98.49                                                       | 77.83                                                          | 75.79                                                                               | 92.66                                                                                    |
| Nagarajan2006_13                           | 90.31                                                       | 65.83                                                          | 80.92                                                                               | 88.26                                                                                    |
| Song2010_15                                | 83.61                                                       | 94.03                                                          | 88.17                                                                               | 84.16                                                                                    |
| Teniposide                                 | 24.52                                                       | 61.17                                                          | 30.07                                                                               | -0.06                                                                                    |
| Van2007_12b                                | 76.79                                                       | 96.23                                                          | 80.45                                                                               | 77.33                                                                                    |
| Van2007_15l                                | 99.61                                                       | 100.19                                                         | 108.60                                                                              | 96.95                                                                                    |
| <b>Area under the curve ROC evaluation</b> | <b>0.729 fair</b>                                           | <b>0.561 fail</b>                                              | <b>0.764 fair</b>                                                                   | <b>0.722 fair</b>                                                                        |

<sup>a</sup> Flexible side chains defined as described in Methods section; <sup>b</sup>Score of the best pose of the largest cluster; <sup>c</sup> waters handled as described in Methods section; <sup>d</sup> mean score of largest cluster of poses.

**Table 12 Evaluation of different score thresholds on the retrieval of true positives and true negatives in flexible docking with waters, using GOLD scoring function**

| Score threshold           | True positives | True negatives |
|---------------------------|----------------|----------------|
| GOLD score $\geq$ 80      | 77 %           | 39 %           |
| GOLD score $\geq$ 85      | 68 %           | 72 %           |
| GOLD score $\geq$ 90      | 45 %           | 83 %           |
| mean GOLD score $\geq$ 75 | 77 %           | 50 %           |
| mean GOLD score $\geq$ 80 | 50 %           | 83 %           |

The score represents the best score of the largest cluster of poses at a 2.0 Å clustering distance. The mean score represents the mean score of the largest cluster.

## References

1. Wall ME, Wani MC, Nicholas AW, Manikumar G, Tele C, Moore L, Truesdale A, Leitner P, Besterman JM (1993) Plant antitumor agents. 30. Synthesis and structure activity of novel camptothecin analogs. *J Med Chem* 36 (18):2689-2700.
2. Morrell A, Placzek M, Parmley S, Grella B, Antony S, Pommier Y, Cushman M (2007) Optimization of the indenone ring of indenoisoquinoline topoisomerase I inhibitors. *J Med Chem* 50 (18):4388-4404.
3. Finlay GJ, Riou JF, Baguley BC (1996) From amsacrine to DACA (N-[2-(dimethylamino)ethyl]acridine-4-carboxamide): selectivity for topoisomerases I and II among acridine derivatives. *Eur J Cancer* 32A (4):708-714.
4. Morrell A, Placzek M, Parmley S, Antony S, Dexheimer TS, Pommier Y, Cushman M (2007) Nitrated indenoisoquinolines as topoisomerase I inhibitors: a systematic study and optimization. *J Med Chem* 50 (18):4419-4430.
5. Cinelli MA, Cordero B, Dexheimer TS, Pommier Y, Cushman M (2009) Synthesis and biological evaluation of 14-(aminoalkyl-aminomethyl)aromathecins as topoisomerase I inhibitors: investigating the hypothesis of shared structure-activity relationships. *Bioorg Med Chem* 17 (20):7145-7155.
6. Drwal MN, Agama K, Wakelin LP, Pommier Y, Griffith R (2011) Exploring DNA topoisomerase I ligand space in search of novel anticancer agents. *PLoS One* 6 (9):e25150.
7. Pommier Y, Leo E, Zhang HL, Marchand C (2010) DNA Topoisomerases and Their Poisoning by Anticancer and Antibacterial Drugs. *Chem Biol* 17 (5):421-433.
8. Wassermann K, Markovits J, Jaxel C, Capranico G, Kohn KW, Pommier Y (1990) Effects of morpholinyl doxorubicins, doxorubicin, and actinomycin D on mammalian DNA topoisomerases I and II. *Mol Pharmacol* 38 (1):38-45.
9. Lackey K, Besterman JM, Fletcher W, Leitner P, Morton B, Sternbach DD (1995) Rigid analogs of camptothecin as DNA topoisomerase I inhibitors. *J Med Chem* 38 (6):906-911.
10. Nagarajan M, Xiao X, Antony S, Kohlhagen G, Pommier Y, Cushman M (2003) Design, synthesis, and biological evaluation of indenoisoquinoline topoisomerase I inhibitors featuring polyamine side chains on the lactam nitrogen. *J Med Chem* 46 (26):5712-5724.
11. Crespi MD, Ivanier SE, Genovese J, Baldi A (1986) Mitoxantrone affects topoisomerase activities in human breast cancer cells. *Biochem Biophys Res Commun* 136 (2):521-528.
12. Morrell A, Antony S, Kohlhagen G, Pommier Y, Cushman M (2004) Synthesis of nitrated indenoisoquinolines as topoisomerase I inhibitors. *Bioorg Med Chem Lett* 14 (14):3659-3663.

13. Nagarajan M, Morrell A, Fort BC, Meckley MR, Antony S, Kohlhagen G, Pommier Y, Cushman M (2004) Synthesis and anticancer activity of simplified indenoisoquinoline topoisomerase I inhibitors lacking substituents on the aromatic rings. *J Med Chem* 47 (23):5651-5661.
14. Nagarajan M, Morrell A, Ioanoviciu A, Antony S, Kohlhagen G, Agama K, Hollingshead M, Pommier Y, Cushman M (2006) Synthesis and evaluation of indenoisoquinoline topoisomerase I inhibitors substituted with nitrogen heterocycles. *J Med Chem* 49 (21):6283-6289.
15. Morrell A, Antony S, Kohlhagen G, Pommier Y, Cushman M (2006) Synthesis of benz[d]indeno[1,2-b]pyran-5,11-diones: versatile intermediates for the design and synthesis of topoisomerase I inhibitors. *Bioorg Med Chem Lett* 16 (7):1846-1849.
16. Song YL, Shao Z, Dexheimer TS, Scher ES, Pommier Y, Cushman M (2010) Structure-Based Design, Synthesis, and Biological Studies of New Anticancer Norindenoisoquinoline Topoisomerase I Inhibitors. *J Med Chem* 53 (5):1979-1989.
17. Morrell A, Antony S, Kohlhagen G, Pommier Y, Cushman M (2006) A systematic study of nitrated indenoisoquinolines reveals a potent topoisomerase I inhibitor. *J Med Chem* 49 (26):7740-7753.
18. Van HT, Le QM, Lee KY, Lee ES, Kwon Y, Kim TS, Le TN, Lee SH, Cho WJ (2007) Convenient synthesis of indeno[1,2-c]isoquinolines as constrained forms of 3-arylisquinolines and docking study of a topoisomerase I inhibitor into DNA-topoisomerase I complex. *Bioorg Med Chem Lett* 17 (21):5763-5767.
